# Supplementary material
Source: Springer Nature journal article supplement (https://www.springermedizin.de/resource/supplementary/12936_2008_619_MOESM1_ESM.pdf/9547836)
Supplement: MOESM1 [file 9547836]

## Honduras 1

...OR-I 23 TGE SQTGNTGG - - - - - DQAGNTVG DQAGSTGG SPQGSTGA SQPGSSEP 65

## FCR3

...OR-II 23 TGE SQTGNTGG GQAGNTGG GQAGNTVG DQAGSTGG SPQGSTGA SQPGSSEP 73

## Brazil

OR-I 23 TGE SQTGNTGG - - - - - GQAGNTVG DQAGSTGG SPQGSTGA SQPGSSEP 65

OR-II 23 TGE SQTGNTGG GQAGNTVG DQAGNTVG DQAGSTGG SPQGS TGA SQPGSSEP 73
